# Supplementary material
Source: Springer Nature journal article supplement (https://www.springermedizin.de/resource/supplementary/12937_2010_310_MOESM4_ESM.pdf/25654842)
Supplement: MOESM4 [file 25654842]

**Table 4. Immunomodulatory Polysaccharide Products: Oral Human Studies**

| Extract                       | Source                                 | Study design                                 | Population                                                                       | N (experimental/control)             | Dose/day                                                            | Duration  | Significant effects                                                                                                                       | Reference |
|-------------------------------|----------------------------------------|----------------------------------------------|----------------------------------------------------------------------------------|--------------------------------------|---------------------------------------------------------------------|-----------|-------------------------------------------------------------------------------------------------------------------------------------------|-----------|
| Arabinogalactans              | <i>Larix occidentalis</i>              | Randomized, double-blind, placebo-controlled | Healthy adults                                                                   | 8/15                                 | 4 g                                                                 | 6 weeks   | ↑ % CD8+ lymphocytes & blood lymphocyte proliferation                                                                                     | [18]      |
| Arabinogalactans (ResistAid™) |                                        |                                              | Healthy adults given pneumococcal vaccinations day 30                            | 21/24                                | 4.5 g                                                               | 72 days   | ↑ plasma IgG subtypes                                                                                                                     | [19]      |
| Fucoidans                     | <i>Undaria pinnatifida</i> sporophylls | Randomized, single-blind, placebo-controlled | Healthy adults                                                                   | 25 (75% fucoidan, 6 (10% fucoidan)/6 | 3 g                                                                 | 12 days   | 75% fucoidan: ↓ #s blood leukocytes, lymphocytes' ↑ plasma stromal derived factor-1, IFN-γ, CD34+ cells; ↑ % CXCR4-expressing CD34+ cells | [21]      |
| Furanose extract (Cold-FX®)   | <i>Panax quinquefolium</i>             | Randomized, double-blind, placebo-controlled | Healthy older adults given influenza immunization at the end of week 4           | 22/21                                | 400 mg                                                              | 4 months  | During weeks 9-16, ↓ incidence of acute respiratory illness, symptom duration                                                             | [20]      |
| Glucans                       | <i>Agaricus subrufescens</i>           | Randomized, double-blind, placebo-controlled | Cervical, ovarian or endometrial cancer patients receiving 3 chemotherapy cycles | 39/61                                | 5.4 g (estimated)                                                   | 6 weeks   | ↑ NK cell activity, ↓ chemotherapy side effects                                                                                           | [64]      |
| Glucans (β-1,3;1,6)           | Not identified                         | Placebo-controlled                           | Recurrent aphthous stomatitis patients                                           | 31/42                                | 20 mg                                                               | 20 days   | ↑ PBL lymphocyte proliferation, ↓ Ulcer Severity Scores                                                                                   | [48]      |
| Glucans (β-1,3;1-6)           | <i>S. cerevisiae</i>                   | Randomized, double-blind, placebo-controlled | Adults with seasonal allergic rhinitis                                           | 12/12                                | 20 mg                                                               | 12 weeks  | 30 minutes after nasal allergen provocation test, nasal lavage fluid: ↓ IL-4, IL-5, % eosinophils, ↑ IL-12                                | [47]      |
| Glucans (PSK)                 | <i>Trametes versicolor</i>             | Randomized, controlled                       | Patients with curatively resected colorectal cancer receiving chemotherapy       | 221/227                              | 200 mg                                                              | 3-5 years | ↑ disease-free survival and overall survival                                                                                              | [56]      |
|                               |                                        | Controlled                                   | Post-surgical colon cancer patients receiving chemotherapy                       | 123/121                              | 3 g for 4 weeks, alternating with 10 4-week courses of chemotherapy | 7 years   | ↑ survival from cancer deaths; no difference in disease-free or overall survival                                                          | [57]      |

|               |                            |                                              |                                                                         |                                 |                                                                     |                        |                                                                                                                                                                                                                                                          |      |
|---------------|----------------------------|----------------------------------------------|-------------------------------------------------------------------------|---------------------------------|---------------------------------------------------------------------|------------------------|----------------------------------------------------------------------------------------------------------------------------------------------------------------------------------------------------------------------------------------------------------|------|
|               |                            |                                              | Post-surgical colorectal cancer patients receiving chemotherapy         | 137/68                          | 3 g daily                                                           | 2 years                | ↑survival in stage III patients; ↓ recurrence in stage II & III patients                                                                                                                                                                                 | [58] |
|               |                            |                                              | Post-surgical gastric cancer patients receiving chemotherapy            | 124/129                         | 3 g for 4 weeks, alternating with 10 4-week courses of chemotherapy | 5-7 years              | ↑ 5-year disease-free survival rate, overall 5-year survival                                                                                                                                                                                             | [59] |
|               |                            |                                              | Pre-surgical gastric or colorectal cancer patients                      | 16 daily; 17 every other day/13 | 3 g daily or on alternate days before surgery                       | <14 days or 14-36 days | ≥14 day treatment: ↑ peripheral blood NK cell activity, PBL cytotoxicity, proportion of PBL helper cells; ↓ proportion of PBL inducer cells; <14 day treatment: ↑ PBL response to PSK and Con A, proportion of regional node lymphocyte suppressor cells | [62] |
|               |                            | Randomized, double-blind, placebo-controlled | Post-surgical stage III-IV colorectal cancer patients                   | 56/55                           | 3 g for 2 months, 2 g for 22 months, 1 g thereafter                 | 8-10 years             | ↑ remission & survival rates                                                                                                                                                                                                                             | [61] |
|               |                            | Controlled                                   | Post-surgical stage III gastric cancer patients receiving chemotherapy  | 32/21                           | 3 g                                                                 | 1 year                 | ↑ survival time                                                                                                                                                                                                                                          | [60] |
| Glucans (PSP) | <i>Trametes versicolor</i> | Randomized, double-blind, placebo-controlled | Conventionally-treated stage III-IV non-small cell lung cancer patients | 34/34                           | 3.06 g                                                              | 1 month                | ↑ blood IgG & IgM, total leukocyte and neutrophil counts, % body fat; ↓ patient withdrawal due to disease progression                                                                                                                                    | [63] |
